# Supplementary material
Source: Springer Nature journal article supplement (https://www.springermedizin.de/resource/supplementary/12889_2008_1749_MOESM3_ESM.pdf/9503884)

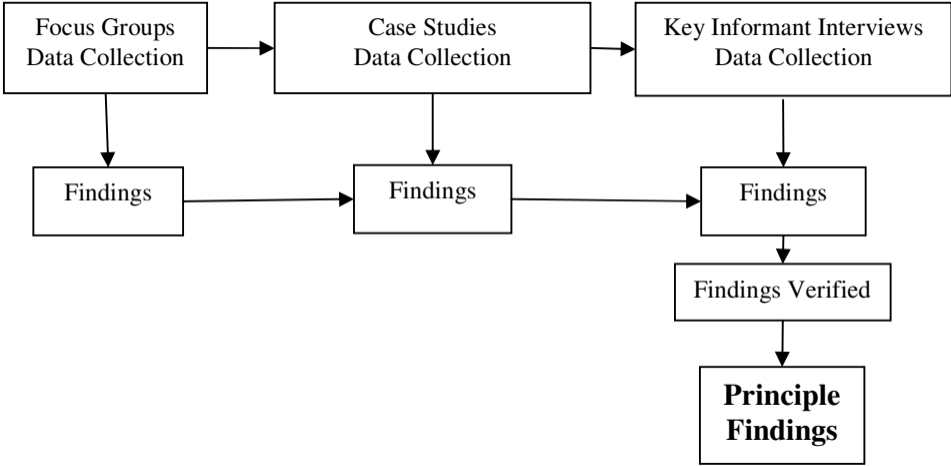

Supplement: MOESM3 [file 9503884]
